# Supplementary material for: Robust detection of undifferentiated iPSC among differentiated cells
Source: PubMed Central journal article supplement (PMC7314783; doi:10.1038/s41598-020-66845-6), 2020-06-24

1 ***Robust detection of undifferentiated iPSC among differentiated cells***

2  
3 Keisuke Sekine, Syusaku Tsuzuki, Ryota Yasui, Tatsuya Kobayashi, Kazuki Ikeda, Yuki  
4 Hamada, Eriko Kanai, J. Gray Camp, Barbara Treutlein, Yasuharu Ueno, Satoshi  
5 Okamoto, Hideki Taniguchi

6  
7  
8 **Supplementary Figure Legends**

9 **Figure S1**

10 Validation of differentiated cells toward hepatic lineage. Gene expression analysis of the  
11 undifferentiated iPSC (iPSC), Definitive endoderm (DE), hepatic endoderm (HE),  
12 immature hepatocyte (IH) , and mature hepatocyte (MH).

13  
14 **Figure S2.**

15 Definitive endoderm (DE), hepatic endoderm (HE), and immature hepatocyte (IH) mature  
16 hepatocytes (MHs)  
17 Novel markers were down-regulated during differentiation in five different iPSC clones.  
18 #1-#5 represents Ff-I01, Ff-I01s04, 1231A3, 1383D2 and 1383D6, respectively.

19  
20 **Figure S3.**

21 Estimated actual RNA count of the markers in one undifferentiated iPSC by droplet  
22 digital PCR.

23  
24 **Figure S4.**

25 Correlation between doubling time at undifferentiated iPSC and residual  
26 undifferentiated cell number at HE (left). Correlation between passage number of  
27 undifferentiated iPSC and its doubling time (right).

28  
29 **Figure S5.**

30 Marker gene expression in three germ lineages derived using different differentiation  
31 methods. a-c) represent adequate differentiation of trilineage. bar: 100um d) Marker  
32 gene expression in each lineage evaluated by qPCR. e) Actual residual undifferentiated  
33 cell number per cm<sup>2</sup> when cells were seeded at a density of 8x10<sup>4</sup> cells/cm<sup>2</sup>.

**Figure S1**

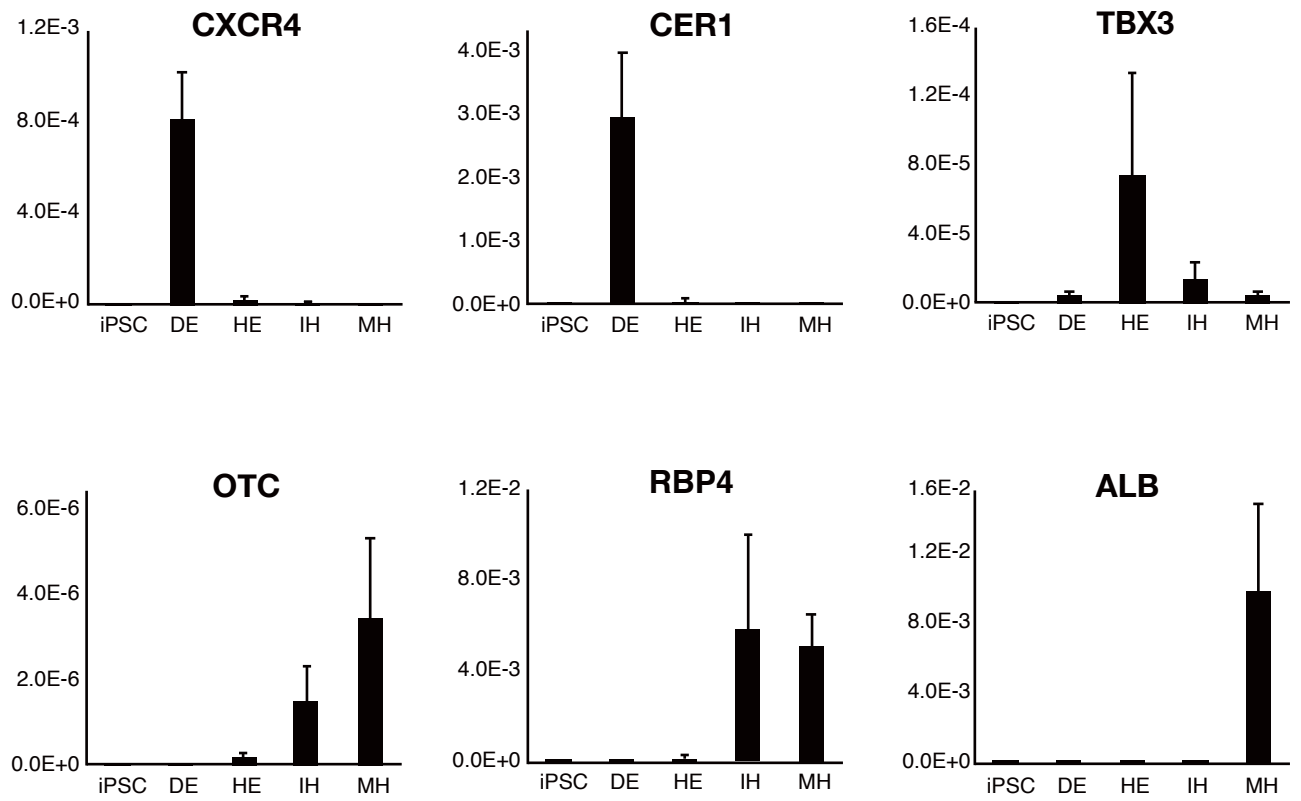

Figure S2

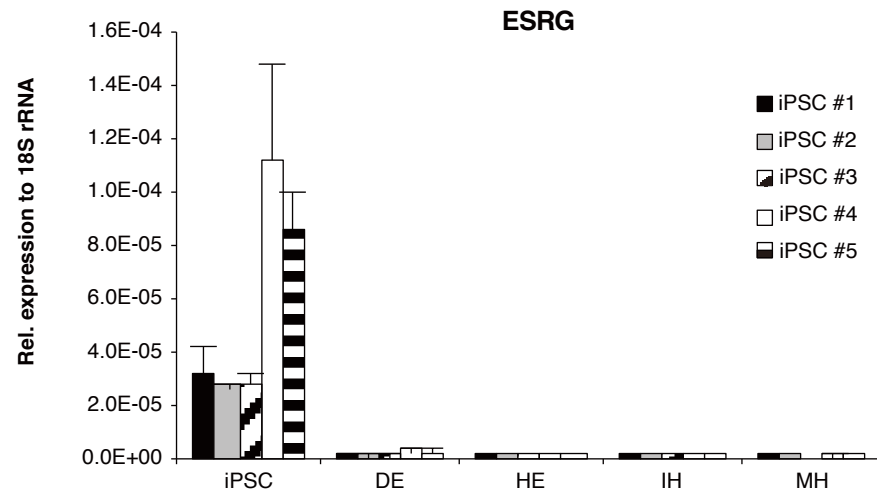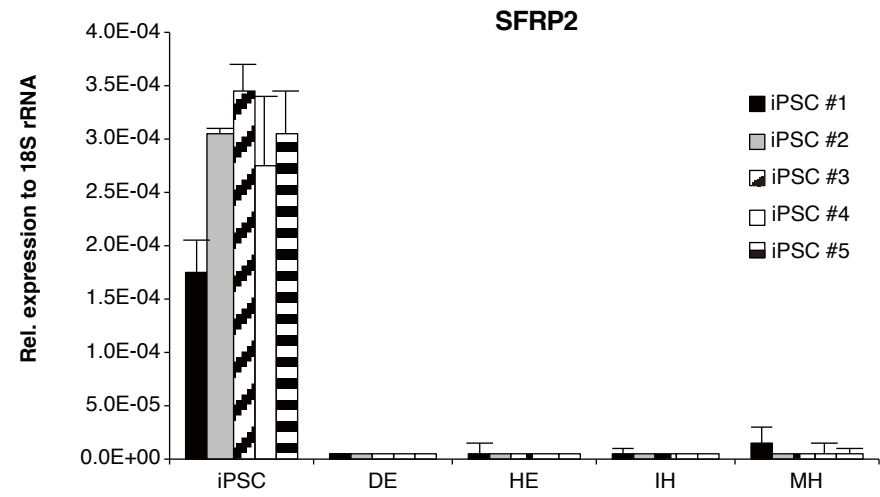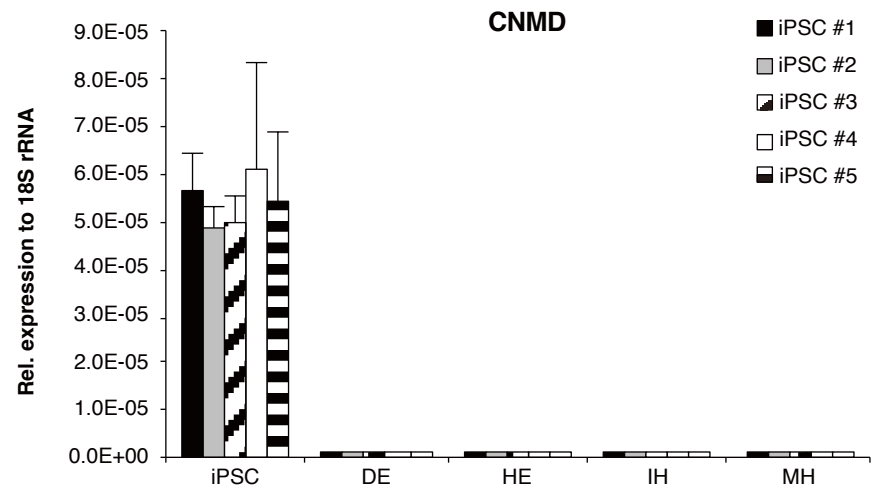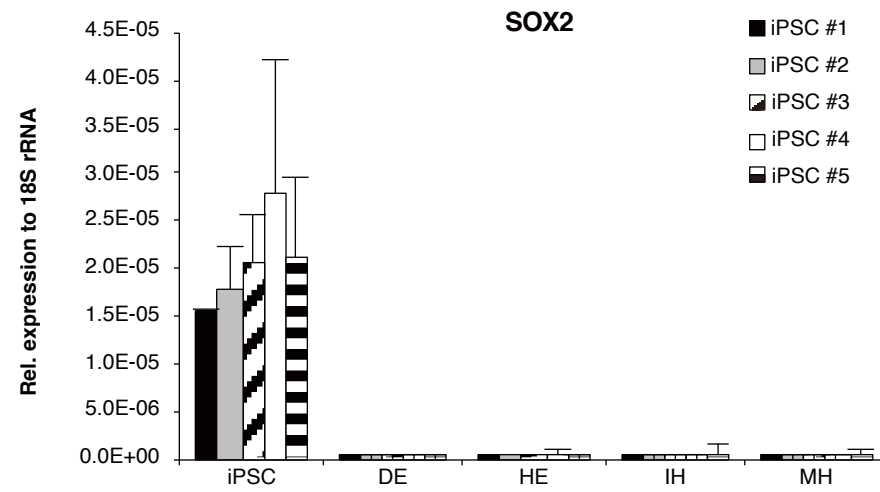

Figure S3

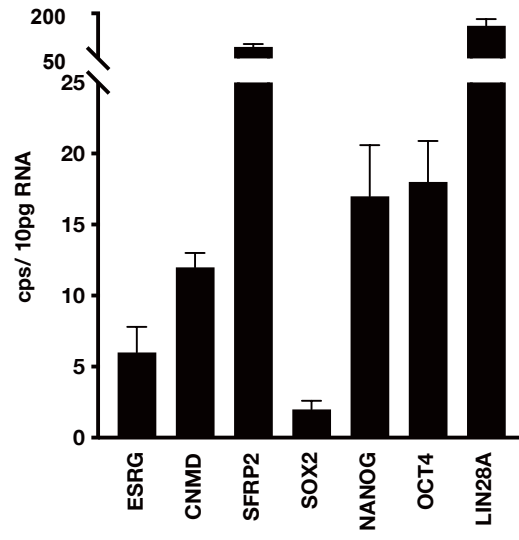

Figure S4

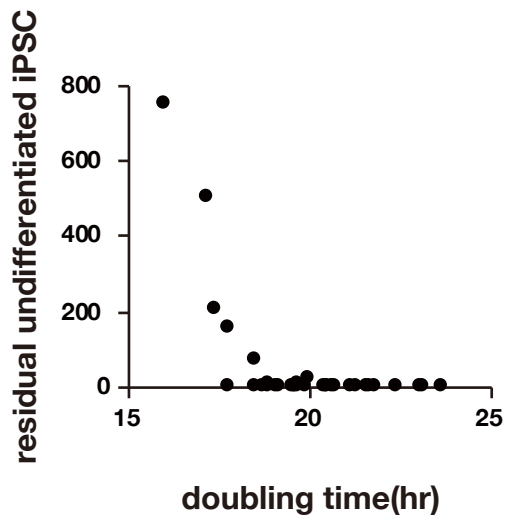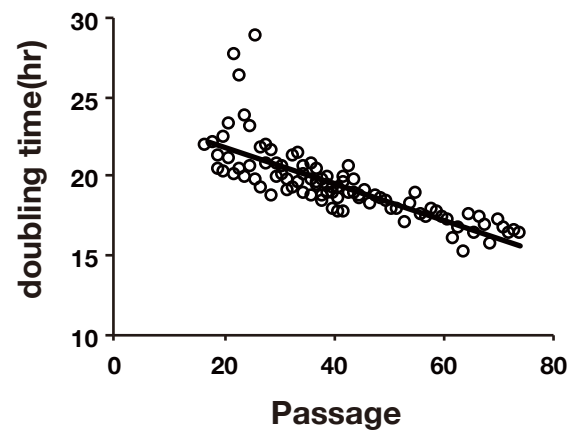

Figure S5

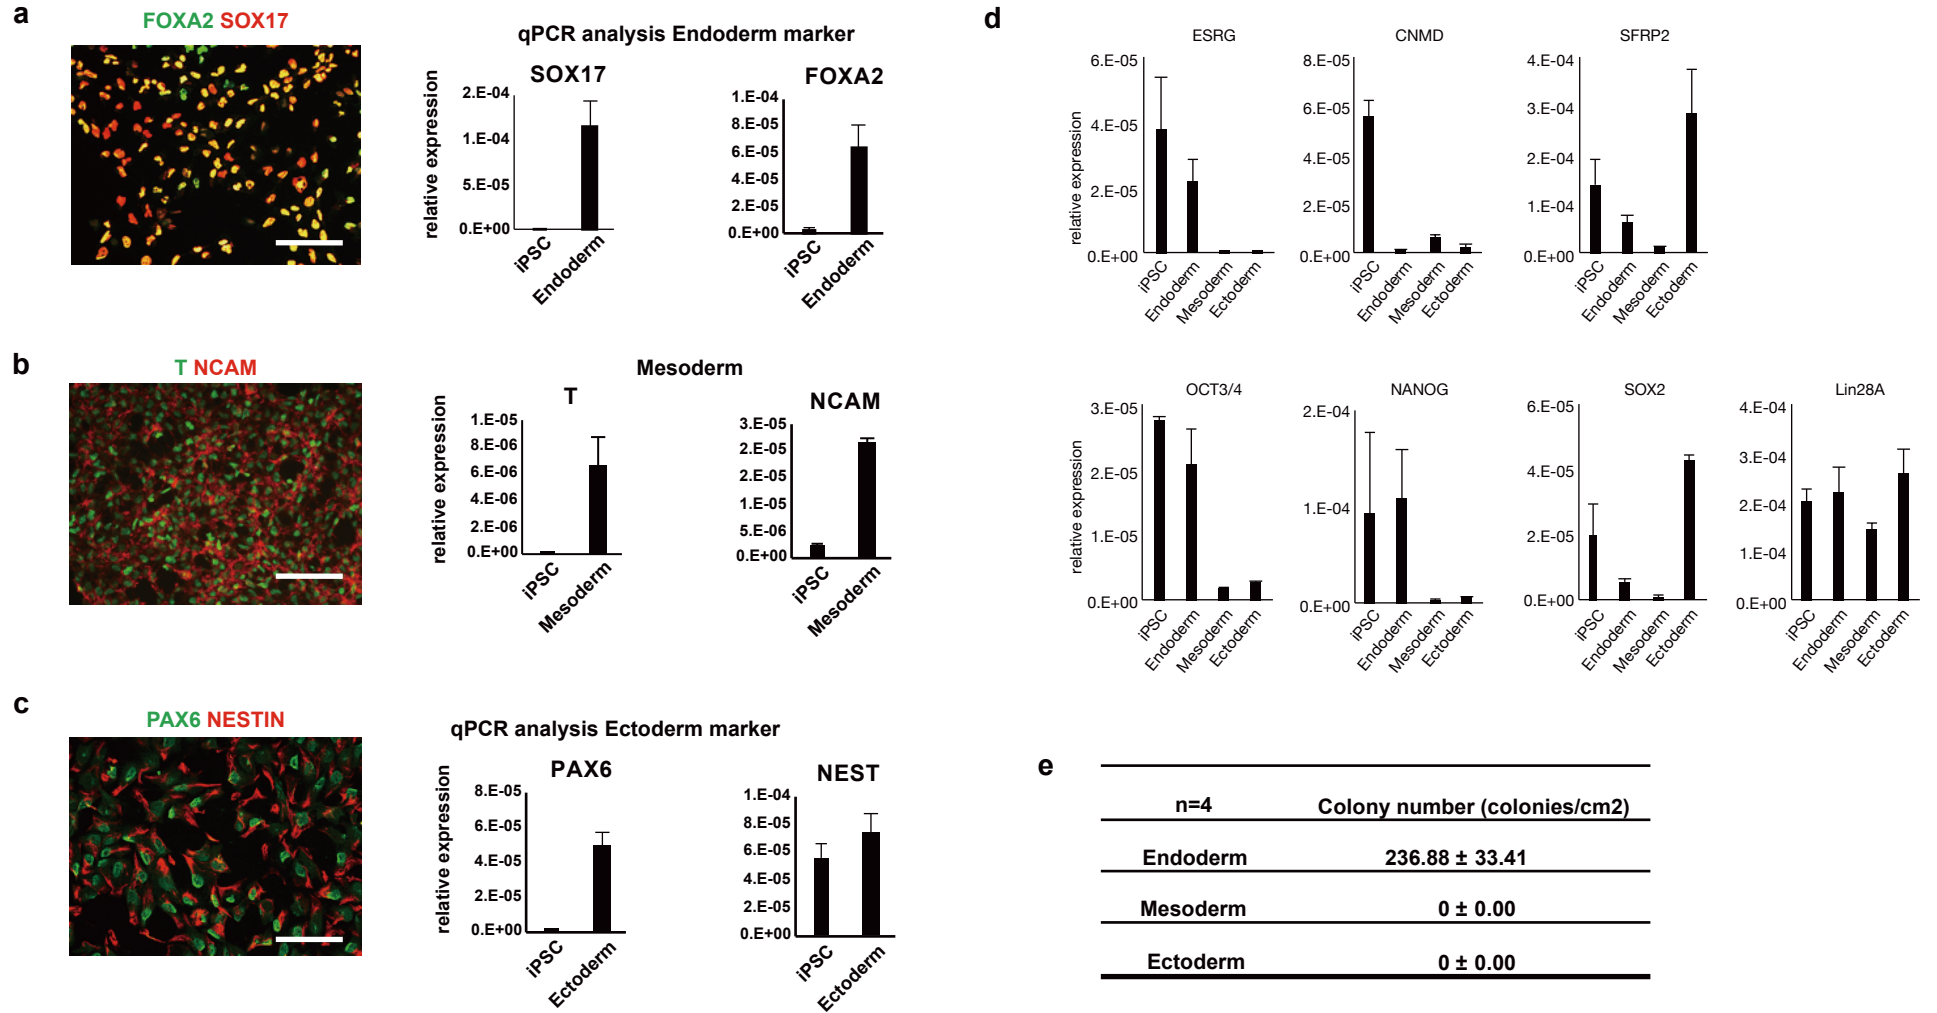

Supplement: 41598_2020_66845_MOESM1_ESM.pdf [file 41598_2020_66845_MOESM1_ESM.pdf]
